# Supplementary material
Source: PubMed Central journal article supplement (PMC4867256)
Supplement: NIHMS775814-supplement-1.pdf [file NIHMS775814-supplement-1.pdf]

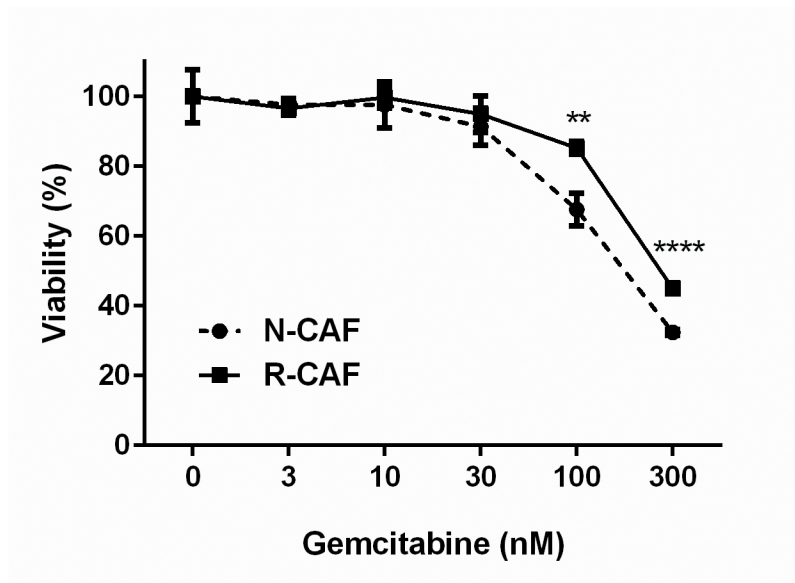

**Figure S1.** N-CAFs and R-CAFs were exposed to the indicated concentrations of gemcitabine for 72h, and viability was measured via MTT assay. 3 biologic replicates were included in the experiment. \*\* $p \leq 0.01$ , \*\*\*\* $p \leq 0.0001$

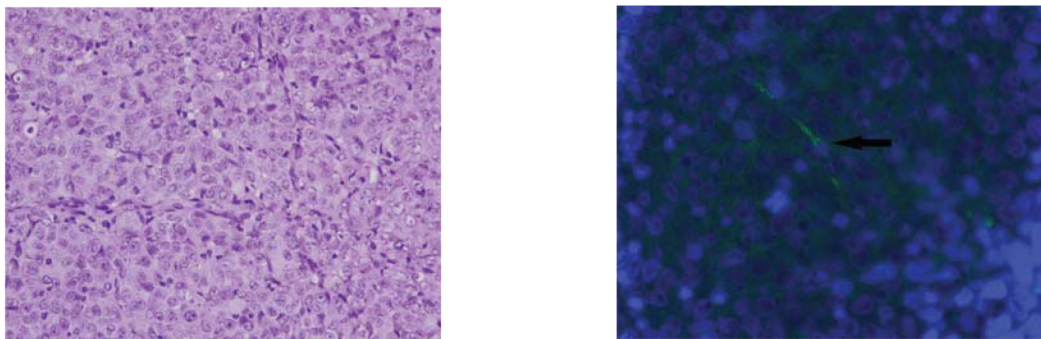

**Figure S2.** MiaPaCa-2 cells ( $1 \times 10^5$ ) were subcutaneously injected with N-CAF cells expressing GFP ( $3 \times 10^5$ ) in NSG mice. At 6 weeks, tumors were harvested and fluorescence microscopy was performed. Representative images of H&E stained sections as well as fluorescence microscopy are displayed. Only occasional GFP+ CAFs were present after 6 weeks.

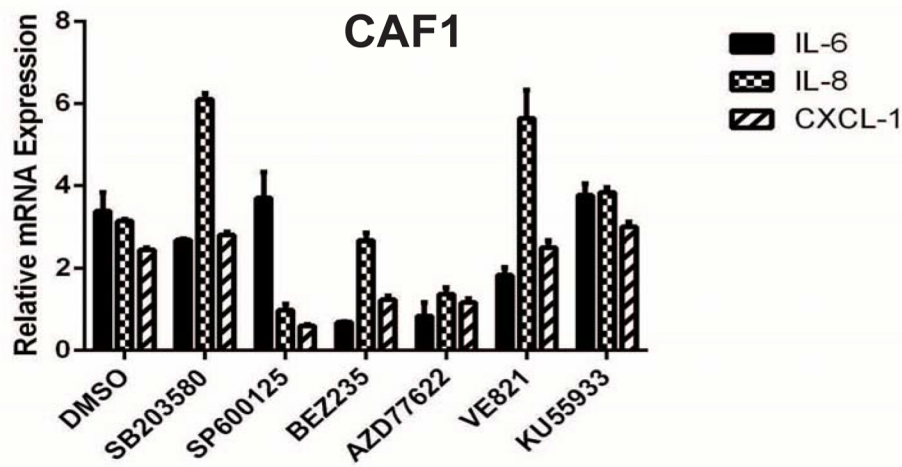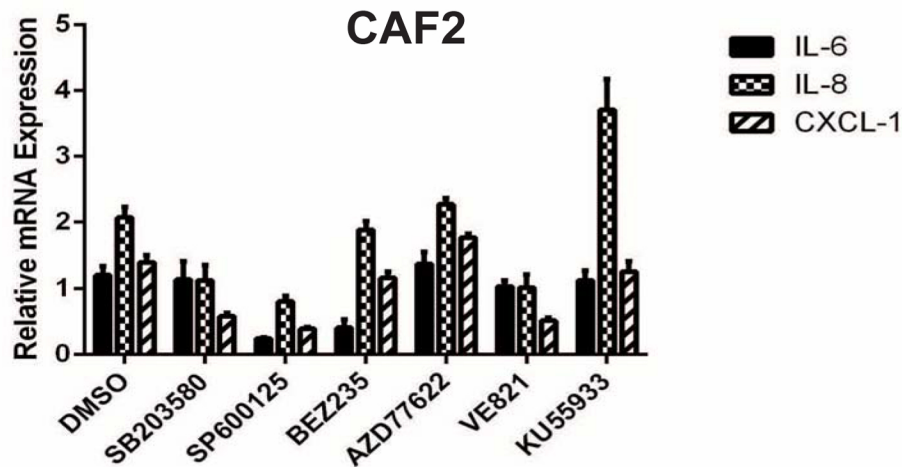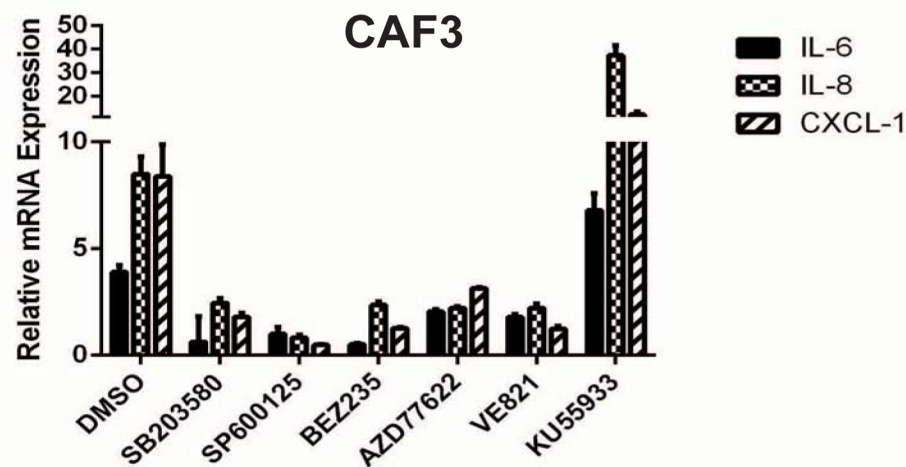

**Figure S3.** Primary CAFs were treated with 1 $\mu$ M GEM plus DMSO or the above listed small molecule inhibitors for 96h and SASP mediator expression was compared to untreated cells via qRT-PCR. Because of limited primary cell numbers, the experiment was performed once in multiple cell lines rather than being replicated in any single line. Drug concentrations and targets: SB203580 10 $\mu$ M- P38 MAPK, SP600125 20 $\mu$ M- JNK, BEZ235 1 $\mu$ M- ATM/ATR/DNA-PK/PI3K/mTOR, AZD77622 200nM- Chk1/Chk2 VE821 2 $\mu$ M- ATR, KU55933 20 $\mu$ M- ATM.

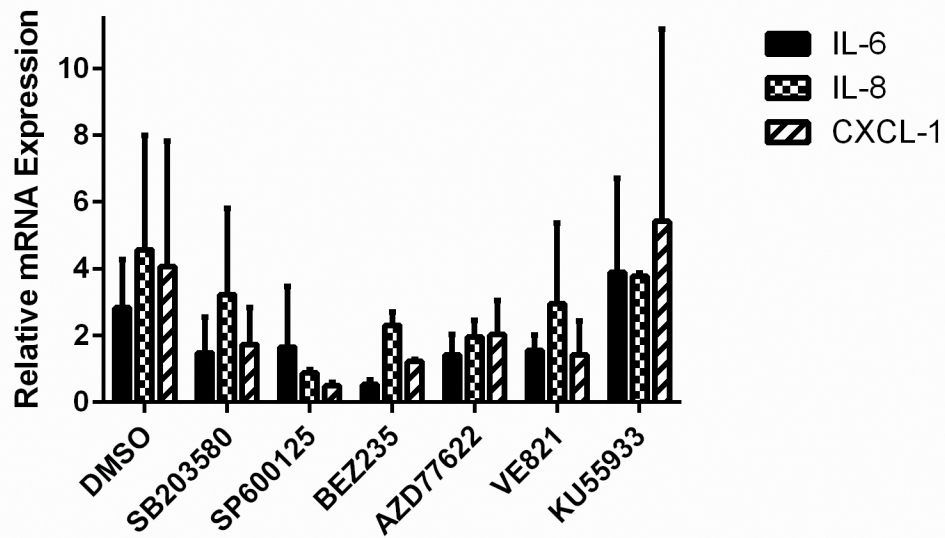

**Figure S4.** Combined data from Figure S3. The mean normalized expression of each marker from CAF1-3 is displayed. In this combined analysis, none of the changes reached statistical significance.

| Gene          | Forward Primer           | Reverse Primer          |
|---------------|--------------------------|-------------------------|
| CXCL-1        | AGGGAATTCACCCCAAGAAC     | ACTATGGGGGATGCAGGATT    |
| CXCL-6        | AGAGCTGCGTTGCACTTGTT     | GCAGTTTACCAATCGTTTTGGGG |
| ICAM-1        | GCTGACGTGTGCAGTAATACTGG  | TTCTGAGACCTCTGGCTTCGT   |
| IL-1 $\alpha$ | CGCCAATGACTCAGAGGAAGA    | AGGGCGTCATTCAGGATGAA    |
| IL-1 $\beta$  | AAACAGATGAAGTGCTCCTTCC   | AAGATGAAGGGAAAGAAGGTGC  |
| IL1R1         | ATGAAATTGATGTTTCGTCCCTGT | ACCACGCAATAGTAATGTCCTG  |
| IL-6          | AAAGAGGCACTGGCAGAAAA     | AGCTCTGGCTTGTTCTCAC     |
| IL-8          | ACTGAGAGTGATTGAGAGTGGAC  | AACCCTCTGCACCCAGTTTTC   |
| SPP1          | GCCGAGGTGATAGTGTGGTT     | TGAGGTGATGTCCTCGTCTG    |
| RPL13         | CATCGTGGCTAAACAGGTAAGT   | GCACGACCTTGAGGGCAGCC    |

**Table S1.** Primer sequences.
